# Supplementary material
Source: bioRxiv or medRxiv preprint supplement (https://medrxiv.org/highwire/filestream/73147/field_highwire_adjunct_files/1/2020.03.01.20029884-2.pdf)
Supplement: Supplementary file [file 2020.03.01.20029884-2.pdf]

**Supplement 2. Distribution of Included Pediatric COVID-19 Cases in Chinese Provinces**

**(n=38).**

| Province  | Pediatric COVID-19 Cases |            |       |
|-----------|--------------------------|------------|-------|
|           | 0-12                     | 13-19      | Total |
| Anhui     | -                        | 1 (100.0%) | 1     |
| Beijing   | 2 (66.7%)                | 1 (33.3%)  | 3     |
| Gansu     | 2 (100.0%)               | -          | 2     |
| Guangdong | 1 (100.0%)               | -          | 1     |
| Guangxi   | 2 (100.0%)               | -          | 2     |
| Guizhou   | 4 (100.0%)               | -          | 4     |
| Jiangxi   | 1 (100.0%)               | -          | 1     |
| Jilin     | 2 (66.7%)                | 1 (33.3%)  | 3     |
| Macau     | -                        | 1 (100.0%) | 1     |
| Qinghai   | 1 (50.0%)                | 1 (50.0%)  | 2     |
| Shaanxi   | 3 (60.0%)                | 2 (40.0%)  | 5     |
| Shanghai  | 1 (100.0%)               | -          | 1     |
| Sichuan   | -                        | 2 (100.0%) | 2     |
| Tianjin   | 1 (50.0%)                | 1 (50.0%)  | 2     |
| Yunnan    | 5 (62.5%)                | 3 (36.5%)  | 8     |

\*Data presented as n= (%).
